# Supplementary material for: Enhanced characterization of breast cancer phenotypes using Raman micro-spectroscopy on stainless steel substrate
Source: Royal Society of Chemistry journal article supplement (doi:10.1039/d2ay01764d), 2023-01-01
Supplement: d2ay01764d1.pdf [file d2ay01764d1.pdf]

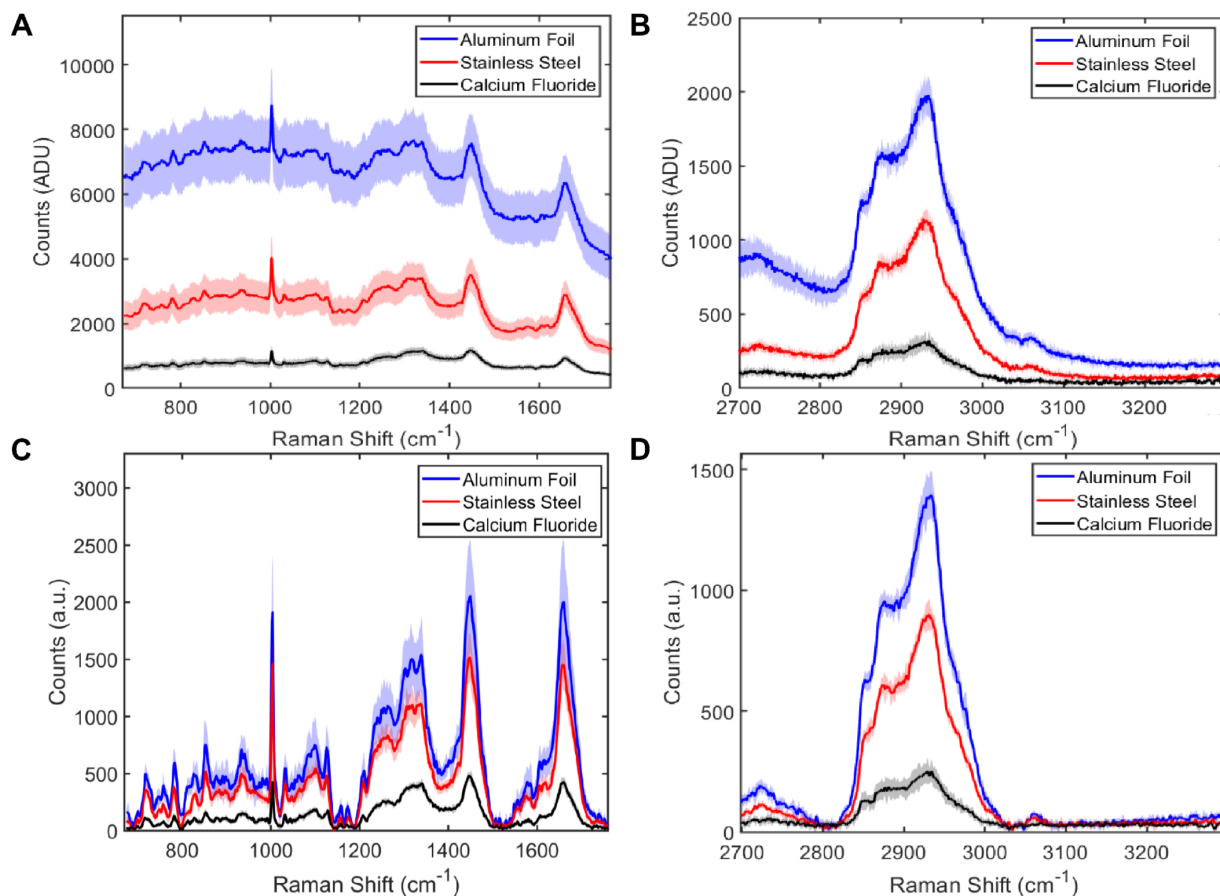

**Supplementary Figure 1:** Comparison of the averaged raw unprocessed Raman spectra (A, B) and the averaged fluorescence-subtracted non-normalized Raman spectra (C, D) in finger print (right) and high wavenumber (left) regions obtained from MDA-MB-468 breast cancer cells grown on aluminum foil (blue), stainless steel (red) and CaF<sub>2</sub> (black) substrates. Lightly shaded region in blue (aluminium), red (stainless steel) and black (CaF<sub>2</sub>) in **A – D** denote the standard deviation for the averaged Raman spectra depicted for the corresponding substrates.
